# Supplementary material for: Active and Passive Carbon Fractions in Contrasting Cropping Systems, Tillage Practices, and Soil Types
Source: MDPI journal article supplement (doi:10.3390/land12020365), 2023-01-29
Supplement: s1 [file s1]

### Supplementary data

**Table S1. Soil pH, total organic C, total N, texture and bulk density (0-20 cm) of the experimental sites**

| <b>District</b>   | <b>Field site (FS)</b> | <b>pH</b> | <b>Total organic carbon (g kg<sup>-1</sup>)</b> | <b>Total-N (g kg<sup>-1</sup>)</b> | <b>Texture Sand (%)</b> | <b>Silt (%)</b> | <b>Clay (%)</b> | <b>Bulk density (Mg m<sup>-3</sup>)</b> |
|-------------------|------------------------|-----------|-------------------------------------------------|------------------------------------|-------------------------|-----------------|-----------------|-----------------------------------------|
| <b>Malda</b>      | <b>Site-1</b>          | 8.47      | 8.83                                            | 1.32                               | 18                      | 66              | 16              | 1.37                                    |
|                   | <b>Site-2</b>          | 6.82      | 7.75                                            | 1.26                               | 35                      | 46              | 19              | 1.31                                    |
|                   | <b>Site-3</b>          | 7.44      | 14.98                                           | 1.33                               | 42                      | 43              | 15              | 1.33                                    |
|                   | <b>Site-4</b>          | 6.80      | 12.13                                           | 1.55                               | 8                       | 64              | 28              | 1.45                                    |
|                   | <b>Mean</b>            | 7.02      | 11.62                                           | 1.38                               | 28                      | 51              | 20              | 1.36                                    |
| <b>Coochbehar</b> | <b>Site-5</b>          | 6.42      | 9.88                                            | 1.01                               | 29                      | 58              | 13              | 1.05                                    |
|                   | <b>Site-6</b>          | 5.91      | 8.85                                            | 0.93                               | 28                      | 62              | 10              | 1.11                                    |
|                   | <b>Site-7</b>          | 5.56      | 10.58                                           | 0.74                               | 28                      | 60              | 12              | 1.17                                    |
|                   | <b>Mean</b>            | 5.96      | 9.77                                            | 0.89                               | 28                      | 60              | 12              | 1.11                                    |

**Table S2. Interaction effects of cropping system, tillage and soil depths on total organic C (TOC) (g/kg) at different sites of Malda and Coochbehar districts**

| Districts      |          |    | Malda  |        |        |        | Cooch Behar |        |        |
|----------------|----------|----|--------|--------|--------|--------|-------------|--------|--------|
| Location       |          |    | Site-1 | Site-2 | Site-3 | Site-4 | Site-5      | Site-6 | Site-7 |
| R-W            | 0 to 5   |    | 12.68  | 14.17  | 14.42  | 17.05  | 15.15       | 7.56   | 14.54  |
|                | 5 to 10  |    | 11.35  | 10.72  | 9.44   | 14.91  | 13.99       | 6.61   | 12.53  |
|                | 10 to 20 |    | 6.69   | 9.31   | 8.07   | 11.65  | 9.76        | 5.73   | 10.14  |
| R-M            | 0 to 5   |    | 12.23  | 15.43  | 16.36  | 20.44  | 15.97       | 9.17   | 14.07  |
|                | 5 to 10  |    | 8.90   | 12.73  | 12.49  | 16.52  | 14.49       | 9.29   | 12.34  |
|                | 10 to 20 |    | 7.60   | 11.22  | 10.52  | 14.42  | 10.33       | 8.68   | 11.13  |
| (p value<0.05) |          |    | 0.000  | 0.635  | 0.338  | 0.201  | 0.849       | 0.000  | 0.053  |
| 0 to 5         | ZT       |    | 13.49  | 16.42  | 15.86  | 18.97  | 16.06       | 10.39  | 16.14  |
|                | CT       |    | 11.42  | 13.18  | 14.93  | 18.52  | 15.07       | 6.34   | 12.48  |
| 5 to 10        | ZT       |    | 11.08  | 12.17  | 10.74  | 16.49  | 14.38       | 8.68   | 13.46  |
|                | CT       |    | 9.16   | 11.28  | 11.19  | 14.95  | 14.10       | 7.21   | 11.41  |
| 10 to 20       | ZT       |    | 7.43   | 9.70   | 7.28   | 11.73  | 9.29        | 7.15   | 10.87  |
|                | CT       |    | 6.86   | 10.84  | 11.31  | 14.34  | 10.80       | 7.26   | 10.40  |
| (p value<0.05) |          |    | 0.025  | 0.000  | 0.000  | 0.001  | 0.001       | 0.000  | 0.000  |
| R-W            | 0 to 5   | ZT | 14.66  | 15.31  | 14.14  | 17.21  | 15.65       | 8.75   | 16.09  |
|                |          | CT | 10.69  | 13.03  | 14.70  | 16.88  | 14.65       | 6.37   | 12.99  |
|                | 5 to 10  | ZT | 11.66  | 11.02  | 8.47   | 16.38  | 13.99       | 7.20   | 14.03  |
|                |          | CT | 11.04  | 10.41  | 10.41  | 13.44  | 13.98       | 6.01   | 11.02  |
|                | 10 to 20 | ZT | 7.69   | 8.80   | 6.29   | 11.37  | 7.63        | 5.46   | 10.76  |
|                |          | CT | 5.69   | 9.83   | 9.85   | 11.93  | 11.88       | 5.99   | 9.52   |
| R-M            | 0 to 5   | ZT | 12.31  | 17.53  | 17.57  | 20.72  | 16.46       | 12.03  | 16.18  |
|                |          | CT | 12.14  | 13.32  | 15.15  | 20.15  | 15.48       | 6.31   | 11.96  |
|                | 5 to 10  | ZT | 10.50  | 13.32  | 13.01  | 16.59  | 14.76       | 10.17  | 12.89  |
|                |          | CT | 7.29   | 12.14  | 11.97  | 16.45  | 14.21       | 8.40   | 11.79  |
|                | 10 to 20 | ZT | 7.17   | 10.59  | 8.26   | 12.09  | 10.96       | 8.84   | 10.98  |
|                |          | CT | 8.03   | 11.85  | 12.78  | 16.75  | 9.71        | 8.52   | 11.28  |
| (p value<0.05) |          |    | 0.000  | 0.458  | 0.018  | 0.094  | 0.000       | 0.000  | 0.037  |

**Table S3. Interaction effects of cropping system, tillage and soil depths on total nitrogen (TN) (g/kg) at different sites of Malda and Coochbehar districts**

| Districts      |          |    | Malda  |        |        |        | Cooch Behar |        |        |
|----------------|----------|----|--------|--------|--------|--------|-------------|--------|--------|
| Location       |          |    | Site-1 | Site-2 | Site-3 | Site-4 | Site-5      | Site-6 | Site-7 |
| R-W            | 0 to 5   |    | 1.20   | 1.20   | 1.45   | 1.94   | 1.59        | 1.09   | 1.53   |
|                | 5 to 10  |    | 1.06   | 1.10   | 1.10   | 1.38   | 1.20        | 1.08   | 1.47   |
|                | 10 to 20 |    | 0.76   | 0.82   | 0.91   | 1.12   | 1.14        | 0.70   | 1.14   |
| R-M            | 0 to 5   |    | 1.32   | 1.44   | 1.49   | 1.84   | 1.67        | 1.23   | 1.53   |
|                | 5 to 10  |    | 1.31   | 1.21   | 1.55   | 1.51   | 1.55        | 1.00   | 1.44   |
|                | 10 to 20 |    | 0.97   | 0.99   | 1.05   | 1.51   | 1.14        | 0.86   | 1.29   |
| (p value<0.05) |          |    | 0.145  | 0.212  | 0.009  | 0.005  | 0.003       | 0.103  | 0.237  |
| 0 to 5         | ZT       |    | 1.32   | 1.49   | 1.54   | 1.84   | 1.64        | 1.22   | 1.63   |
|                | CT       |    | 1.20   | 1.15   | 1.40   | 1.93   | 1.62        | 1.11   | 1.43   |
| 5 to 10        | ZT       |    | 1.12   | 1.30   | 1.42   | 1.51   | 1.33        | 1.13   | 1.49   |
|                | CT       |    | 1.26   | 1.00   | 1.23   | 1.38   | 1.42        | 0.94   | 1.42   |
| 10 to 20       | ZT       |    | 0.80   | 0.95   | 0.92   | 1.17   | 1.08        | 0.80   | 1.14   |
|                | CT       |    | 0.93   | 0.86   | 1.03   | 1.45   | 1.20        | 0.76   | 1.28   |
| (p value<0.05) |          |    | 0.000  | 0.004  | 0.064  | 0.021  | 0.377       | 0.476  | 0.017  |
| R-W            | 0 to 5   | ZT | 1.25   | 1.44   | 1.57   | 1.98   | 1.56        | 1.13   | 1.58   |
|                |          | CT | 1.15   | 0.96   | 1.34   | 1.89   | 1.62        | 1.06   | 1.48   |
|                | 5 to 10  | ZT | 0.95   | 1.35   | 1.15   | 1.64   | 1.12        | 1.08   | 1.59   |
|                |          | CT | 1.17   | 0.84   | 1.04   | 1.12   | 1.27        | 1.07   | 1.35   |
|                | 10 to 20 | ZT | 0.80   | 0.87   | 0.84   | 1.01   | 1.04        | 0.73   | 1.13   |
|                |          | CT | 0.72   | 0.77   | 0.98   | 1.22   | 1.23        | 0.66   | 1.14   |
| R-M            | 0 to 5   | ZT | 1.39   | 1.55   | 1.52   | 1.70   | 1.71        | 1.31   | 1.67   |
|                |          | CT | 1.25   | 1.33   | 1.46   | 1.97   | 1.62        | 1.15   | 1.38   |
|                | 5 to 10  | ZT | 1.28   | 1.25   | 1.68   | 1.38   | 1.54        | 1.18   | 1.40   |
|                |          | CT | 1.35   | 1.16   | 1.42   | 1.63   | 1.56        | 0.81   | 1.48   |
|                | 10 to 20 | ZT | 0.80   | 1.04   | 1.01   | 1.33   | 1.11        | 0.86   | 1.15   |
|                |          | CT | 1.14   | 0.95   | 1.08   | 1.68   | 1.16        | 0.85   | 1.42   |
| (p value<0.05) |          |    | 0.001  | 0.022  | 0.449  | 0.081  | 0.985       | 0.212  | 0.058  |

**Table S4. Interaction effects of cropping system, tillage and soil depths on active carbon (AC) (g/kg) at different sites of Malda and Coochbehar districts**

| Districts      |          |    | Malda  |        |        |        | Cooch Behar |        |        |
|----------------|----------|----|--------|--------|--------|--------|-------------|--------|--------|
| Location       |          |    | Site-1 | Site-2 | Site-3 | Site-4 | Site-5      | Site-6 | Site-7 |
| R-W            | 0 to 5   |    | 0.56   | 0.51   | 0.62   | 0.65   | 0.57        | 0.36   | 0.42   |
|                | 5 to 10  |    | 0.34   | 0.37   | 0.32   | 0.49   | 0.49        | 0.26   | 0.27   |
|                | 10 to 20 |    | 0.22   | 0.34   | 0.36   | 0.38   | 0.31        | 0.28   | 0.26   |
| R-M            | 0 to 5   |    | 0.50   | 0.58   | 0.82   | 0.90   | 0.55        | 0.29   | 0.38   |
|                | 5 to 10  |    | 0.26   | 0.40   | 0.57   | 0.70   | 0.49        | 0.30   | 0.29   |
|                | 10 to 20 |    | 0.22   | 0.34   | 0.47   | 0.61   | 0.37        | 0.32   | 0.30   |
| (p value<0.05) |          |    | 0.014  | 0.020  | 0.008  | 0.336  | 0.164       | 0.000  | 0.006  |
| 0 to 5         | ZT       |    | 0.57   | 0.64   | 0.77   | 0.79   | 0.61        | 0.38   | 0.51   |
|                | CT       |    | 0.50   | 0.45   | 0.67   | 0.76   | 0.51        | 0.27   | 0.30   |
| 5 to 10        | ZT       |    | 0.31   | 0.42   | 0.42   | 0.62   | 0.52        | 0.24   | 0.31   |
|                | CT       |    | 0.28   | 0.35   | 0.46   | 0.58   | 0.46        | 0.31   | 0.25   |
| 10 to 20       | ZT       |    | 0.23   | 0.35   | 0.27   | 0.42   | 0.36        | 0.29   | 0.30   |
|                | CT       |    | 0.22   | 0.33   | 0.56   | 0.58   | 0.32        | 0.31   | 0.26   |
| (p value<0.05) |          |    | 0.026  | 0.000  | 0.000  | 0.000  | 0.243       | 0.000  | 0.000  |
| R-W            | 0 to 5   | ZT | 0.57   | 0.60   | 0.63   | 0.71   | 0.57        | 0.38   | 0.54   |
|                |          | CT | 0.55   | 0.41   | 0.60   | 0.59   | 0.57        | 0.34   | 0.31   |
|                | 5 to 10  | ZT | 0.35   | 0.41   | 0.31   | 0.53   | 0.52        | 0.23   | 0.28   |
|                |          | CT | 0.33   | 0.32   | 0.32   | 0.46   | 0.46        | 0.28   | 0.25   |
|                | 10 to 20 | ZT | 0.25   | 0.37   | 0.24   | 0.36   | 0.33        | 0.29   | 0.29   |
|                |          | CT | 0.20   | 0.32   | 0.47   | 0.41   | 0.30        | 0.28   | 0.23   |
| R-M            | 0 to 5   | ZT | 0.57   | 0.67   | 0.90   | 0.87   | 0.65        | 0.37   | 0.48   |
|                |          | CT | 0.44   | 0.49   | 0.74   | 0.92   | 0.46        | 0.21   | 0.28   |
|                | 5 to 10  | ZT | 0.28   | 0.42   | 0.53   | 0.71   | 0.51        | 0.25   | 0.34   |
|                |          | CT | 0.24   | 0.37   | 0.61   | 0.70   | 0.46        | 0.35   | 0.25   |
|                | 10 to 20 | ZT | 0.20   | 0.33   | 0.30   | 0.48   | 0.38        | 0.30   | 0.32   |
|                |          | CT | 0.24   | 0.35   | 0.64   | 0.74   | 0.35        | 0.34   | 0.28   |
| (p value<0.05) |          |    | 0.002  | 0.600  | 0.019  | 0.007  | 0.024       | 0.002  | 0.119  |

**Table S5. Interaction effects of cropping system, tillage and soil depths on passive carbon (PC) (g/kg) at different sites of Malda and Coochbehar districts**

| Districts      |          |    | Malda  |        |        |        | Cooch Behar |        |        |
|----------------|----------|----|--------|--------|--------|--------|-------------|--------|--------|
| Location       |          |    | Site-1 | Site-2 | Site-3 | Site-4 | Site-5      | Site-6 | Site-7 |
| R-W            | 0 to 5   |    | 12.11  | 13.66  | 13.80  | 16.39  | 14.58       | 7.20   | 14.12  |
|                | 5 to 10  |    | 11.01  | 10.35  | 9.13   | 14.42  | 13.49       | 6.35   | 12.26  |
|                | 10 to 20 |    | 6.47   | 8.97   | 7.71   | 11.27  | 9.44        | 5.44   | 9.88   |
| R-M            | 0 to 5   |    | 11.72  | 14.84  | 15.54  | 19.54  | 15.42       | 8.88   | 13.69  |
|                | 5 to 10  |    | 8.63   | 12.34  | 11.92  | 15.82  | 14.00       | 8.99   | 12.05  |
|                | 10 to 20 |    | 7.38   | 10.88  | 10.05  | 13.81  | 9.97        | 8.36   | 10.83  |
| (p value<0.05) |          |    | 0.000  | 0.574  | 0.359  | 0.210  | 0.811       | 0.000  | 0.059  |
| 0 to 5         | ZT       |    | 12.91  | 15.78  | 15.09  | 18.17  | 15.45       | 10.01  | 15.63  |
|                | CT       |    | 10.92  | 12.72  | 14.25  | 17.76  | 14.55       | 6.07   | 12.18  |
| 5 to 10        | ZT       |    | 10.77  | 11.76  | 10.32  | 15.87  | 13.86       | 8.44   | 13.15  |
|                | CT       |    | 8.88   | 10.93  | 10.73  | 14.37  | 13.64       | 6.89   | 11.16  |
| 10 to 20       | ZT       |    | 7.21   | 9.35   | 7.01   | 11.31  | 8.94        | 6.86   | 10.57  |
|                | CT       |    | 6.65   | 10.51  | 10.76  | 13.77  | 10.47       | 6.95   | 10.14  |
| (p value<0.05) |          |    | 0.034  | 0.000  | 0.000  | 0.001  | 0.001       | 0.000  | 0.000  |
| R-W            | 0 to 5   | ZT | 14.09  | 14.71  | 13.51  | 16.50  | 15.08       | 8.37   | 15.55  |
|                |          | CT | 10.14  | 12.62  | 14.10  | 16.29  | 14.08       | 6.03   | 12.68  |
|                | 5 to 10  | ZT | 11.31  | 10.61  | 8.16   | 15.85  | 13.47       | 6.96   | 13.75  |
|                |          | CT | 10.71  | 10.09  | 10.09  | 12.98  | 13.52       | 5.73   | 10.77  |
|                | 10 to 20 | ZT | 7.44   | 8.43   | 6.05   | 11.01  | 7.30        | 5.17   | 10.48  |
|                |          | CT | 5.50   | 9.51   | 9.38   | 11.53  | 11.58       | 5.71   | 9.29   |
| R-M            | 0 to 5   | ZT | 11.74  | 16.86  | 16.67  | 19.85  | 15.81       | 11.66  | 15.70  |
|                |          | CT | 11.70  | 12.83  | 14.41  | 19.23  | 15.02       | 6.11   | 11.68  |
|                | 5 to 10  | ZT | 10.22  | 12.90  | 12.48  | 15.88  | 14.25       | 9.92   | 12.55  |
|                |          | CT | 7.05   | 11.77  | 11.37  | 15.75  | 13.75       | 8.05   | 11.54  |
|                | 10 to 20 | ZT | 6.97   | 10.27  | 7.96   | 11.61  | 10.57       | 8.54   | 10.66  |
|                |          | CT | 7.79   | 11.50  | 12.14  | 16.01  | 9.36        | 8.19   | 11.00  |
| (p value<0.05) |          |    | 0.000  | 0.459  | 0.021  | 0.093  | 0.000       | 0.000  | 0.028  |
